# Supplementary material for: Violapyrones H and I, New Cytotoxic Compounds Isolated from Streptomyces sp. Associated with the Marine Starfish Acanthaster planci
Source: MDPI journal article supplement (doi:10.3390/md12063283), 2014-05-30

## Supplementary Information

**Figure S1.**  $^1\text{H}$  NMR spectrum of violapyrone H (**1**) in  $\text{CD}_3\text{OD}$  (500 MHz).

**Figure S2.**  $^{13}\text{C}$  NMR spectrum of violapyrone H (**1**) in  $\text{CD}_3\text{OD}$  (125 MHz).

**Figure S3.** HSQC spectrum of violapyrone H (**1**) in  $\text{CD}_3\text{OD}$ .

**Figure S4.** COSY spectrum of violapyrone H (**1**) in  $\text{CD}_3\text{OD}$ .

**Figure S5.** HMBC spectrum of violapyrone H (**1**) in  $\text{CD}_3\text{OD}$ .

**Figure S6.** HR-ESIMS data of violapyrone H (**1**).

**Figure S7.**  $^1\text{H}$  NMR spectrum of violapyrone I (**2**) in  $\text{CD}_3\text{OD}$  (500 MHz).

**Figure S8.**  $^{13}\text{C}$  NMR spectrum of violapyrone I (**2**) in  $\text{CD}_3\text{OD}$  (125 MHz).

**Figure S9.** HSQC spectrum of violapyrone I (**2**) in  $\text{CD}_3\text{OD}$ .

**Figure S10.** COSY spectrum of violapyrone I (**2**) in  $\text{CD}_3\text{OD}$ .

**Figure S11.** HMBC spectrum of violapyrone I (**2**) in  $\text{CD}_3\text{OD}$ .

**Figure S12.** HR-ESIMS data of violapyrone I (**2**).

**Figure S13.**  $^1\text{H}$  NMR spectrum of violapyrone B (**3**) in  $\text{CD}_3\text{OD}$  (500 MHz).

**Figure S14.**  $^{13}\text{C}$  NMR spectrum of violapyrone B (**3**) in  $\text{CD}_3\text{OD}$  (125 MHz).

**Figure S15.**  $^1\text{H}$  NMR spectrum of natural (*S*)-violapyrone C (**4**) in  $\text{CD}_3\text{OD}$  (500 MHz).

**Figure S16.**  $^1\text{H}$  NMR spectrum of synthetic (*S*)-violapyrone C in  $\text{CD}_3\text{OD}$  (500 MHz).

**Figure S17.**  $^{13}\text{C}$  NMR spectrum of natural (*S*)-violapyrone C (**4**) in  $\text{CD}_3\text{OD}$  (125 MHz).

**Figure S18.**  $^{13}\text{C}$  NMR spectrum of synthetic (*S*)-violapyrone C in  $\text{CD}_3\text{OD}$  (125 MHz).

**Figure S1.**  $^1\text{H}$  NMR spectrum of violapyrone H (1) in  $\text{CD}_3\text{OD}$  (500 MHz).

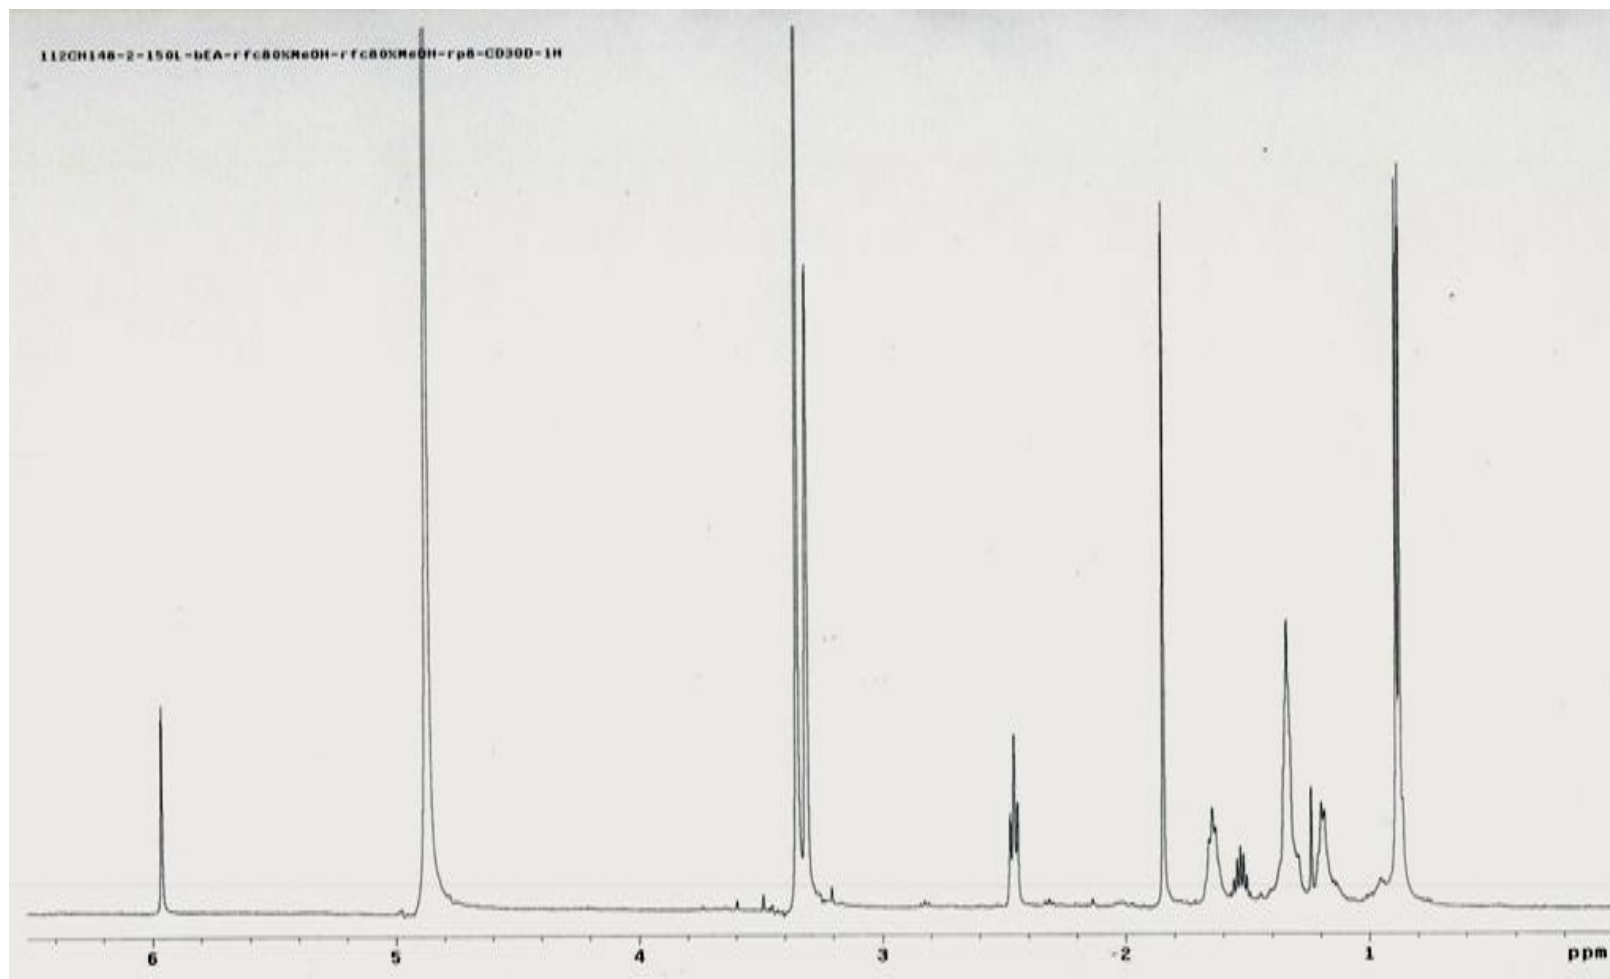

**Figure S2.**  $^{13}\text{C}$  NMR spectrum of violapyrone H (1) in  $\text{CD}_3\text{OD}$  (125 MHz).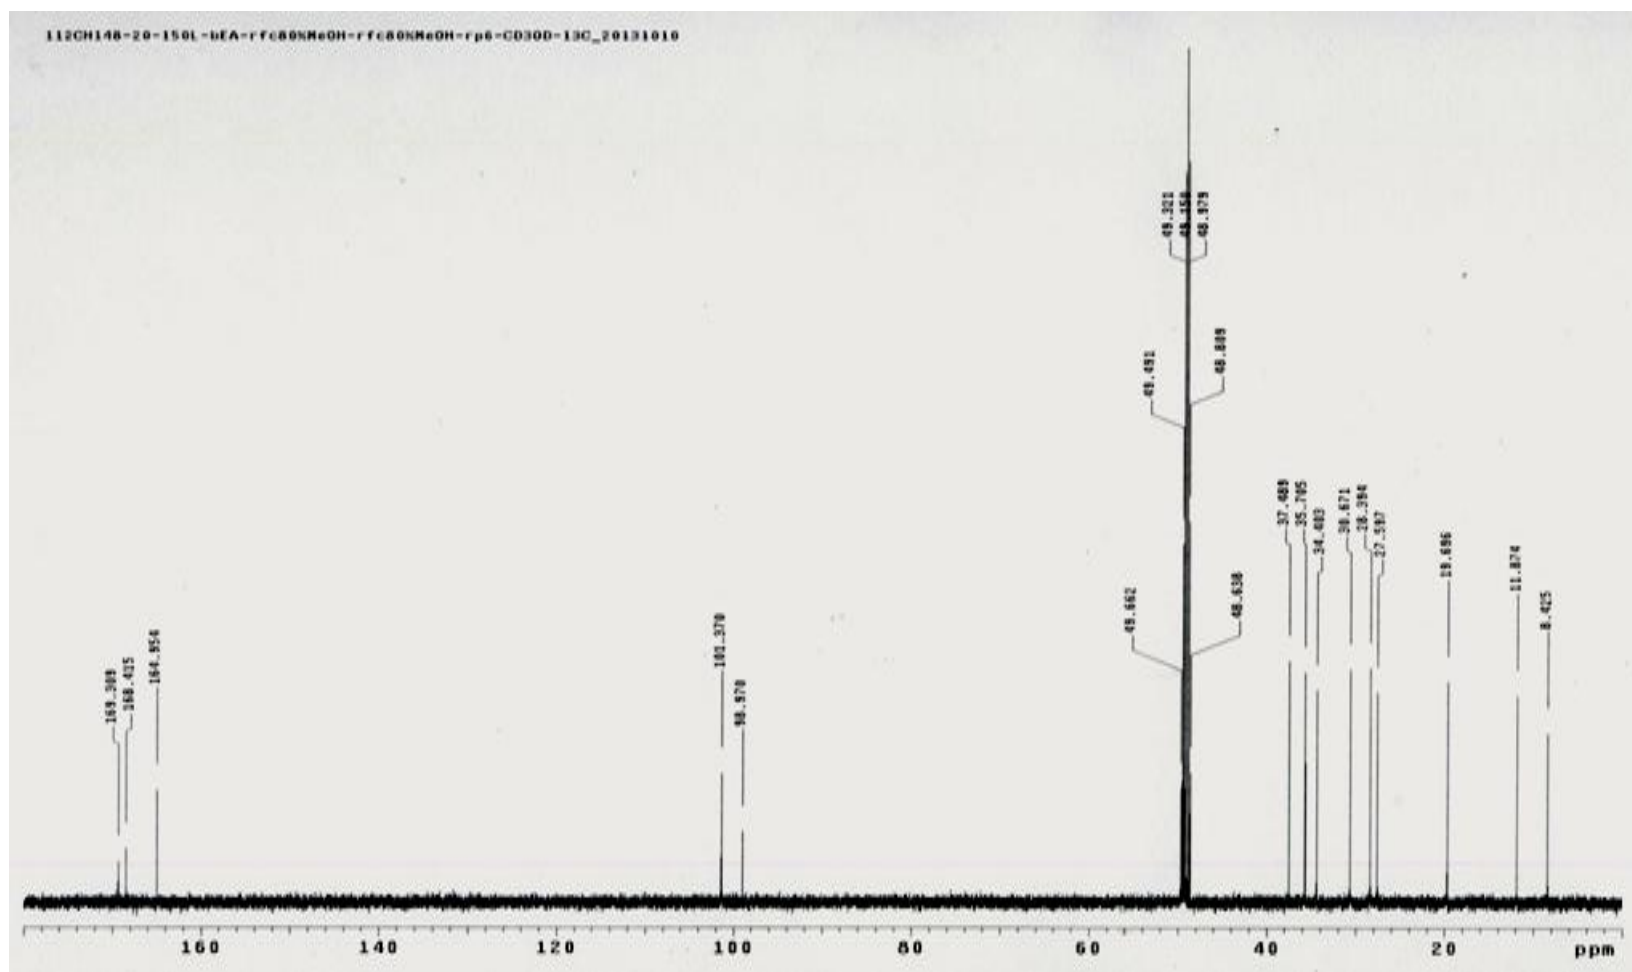

**Figure S3.** HSQC spectrum of violapyrone H (1) in CD<sub>3</sub>OD.

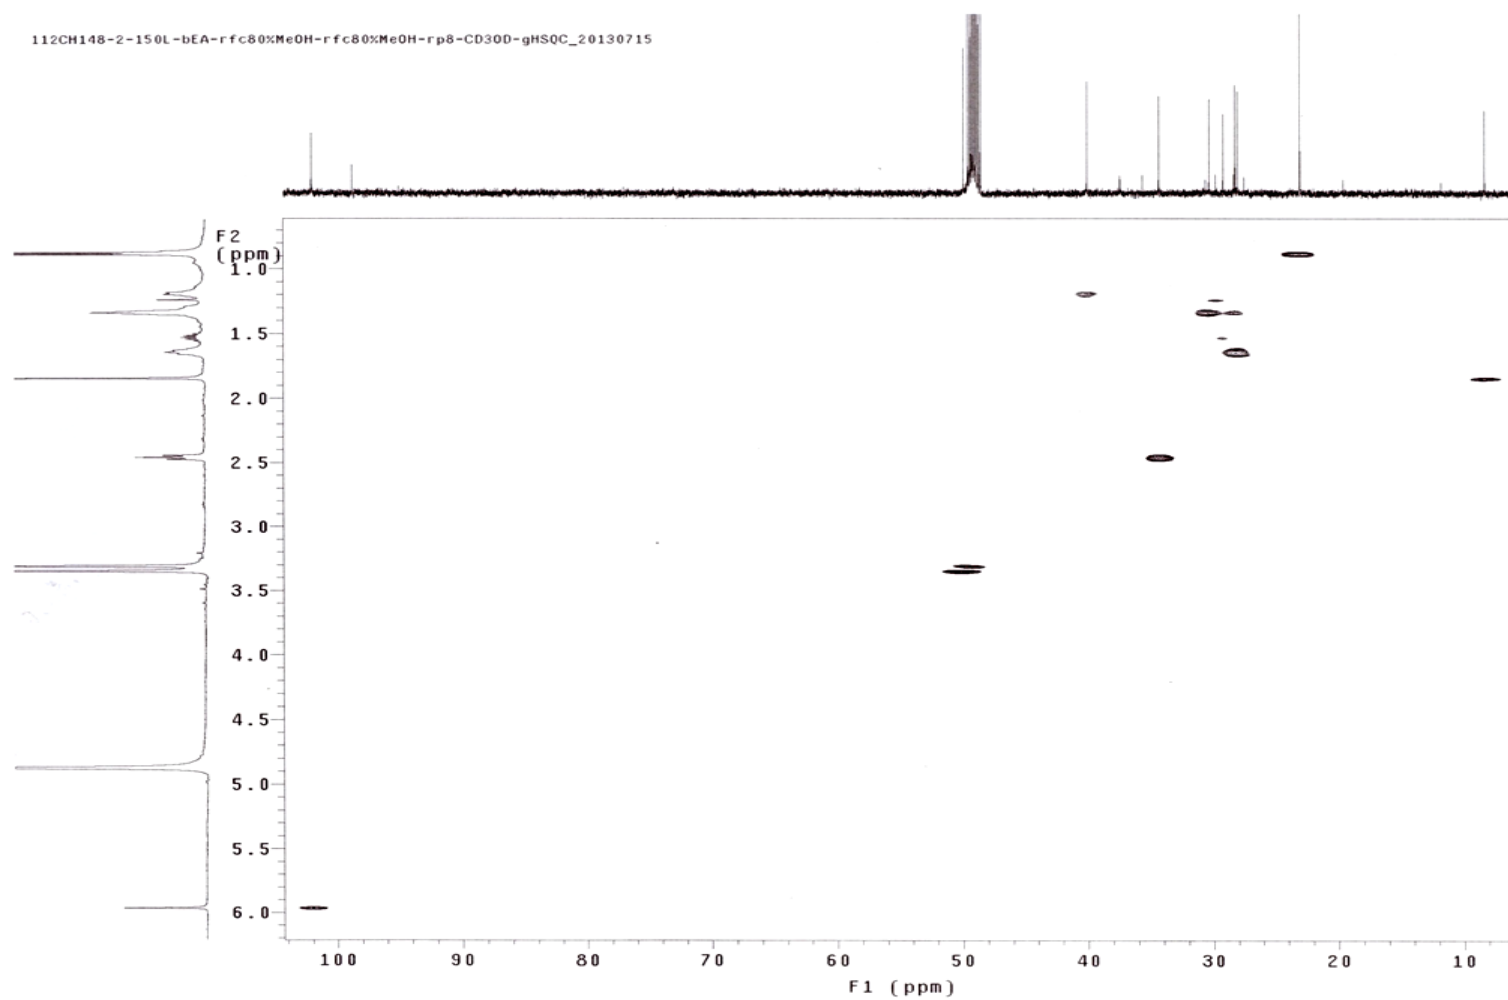

Figure S4. COSY spectrum of violapyrone H (1) in CD3OD.

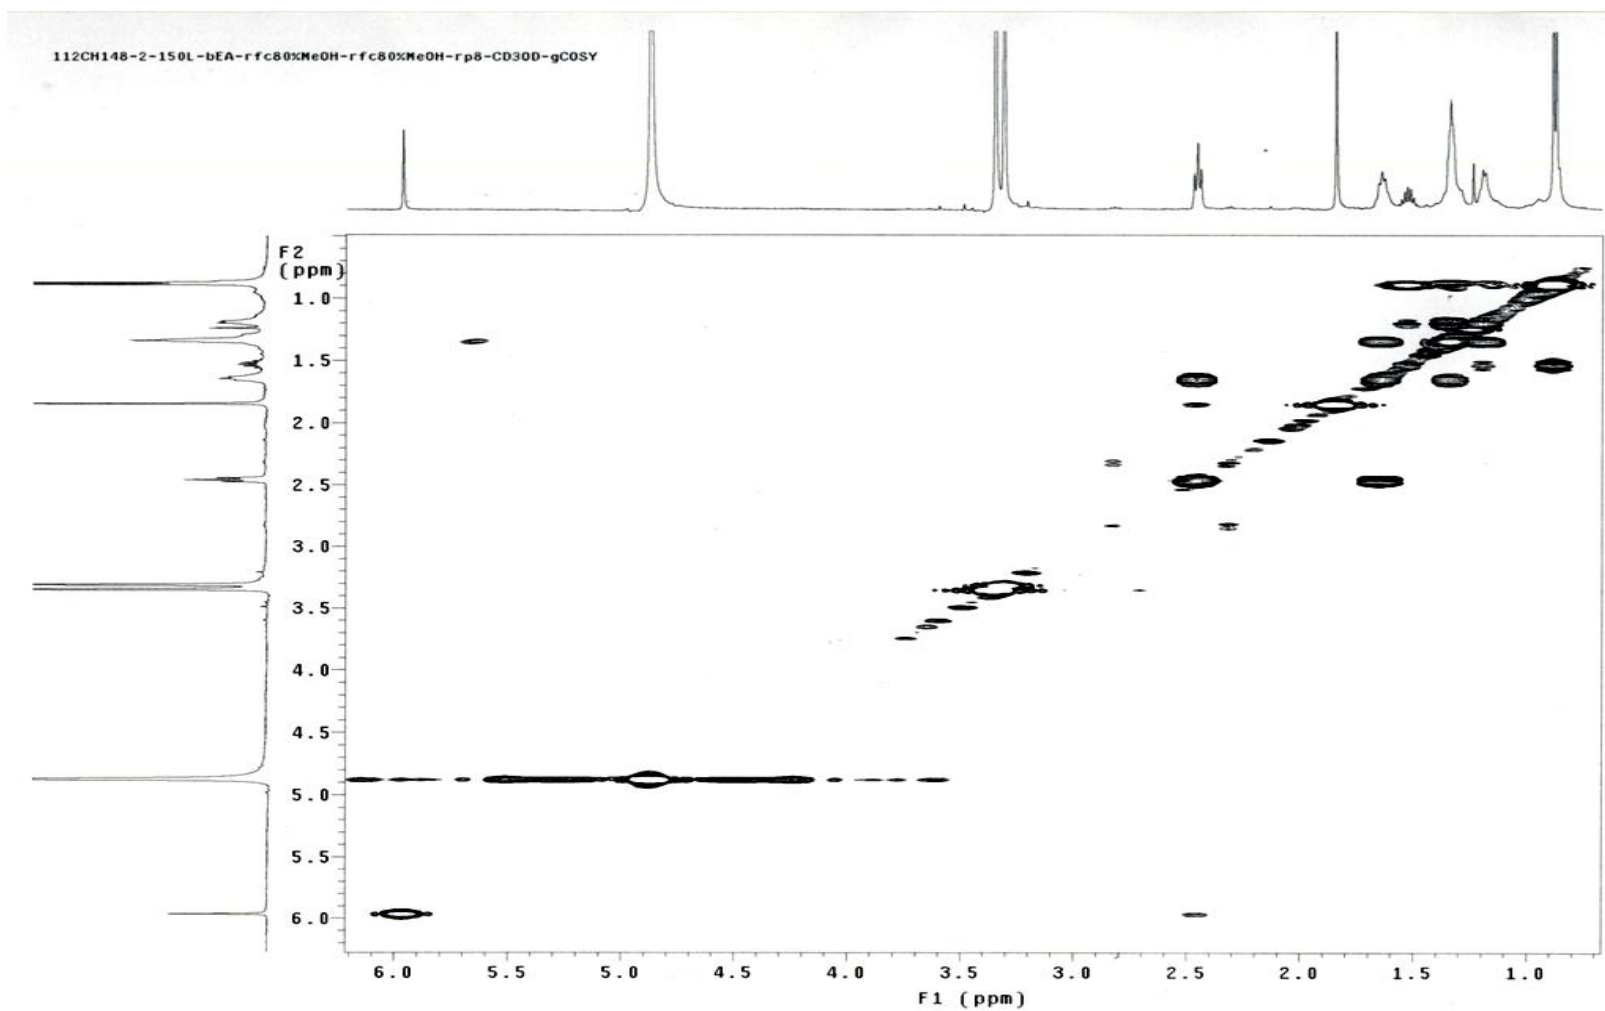

Figure S5. HMBC spectrum of violapyrone H (1) in CD<sub>3</sub>OD.

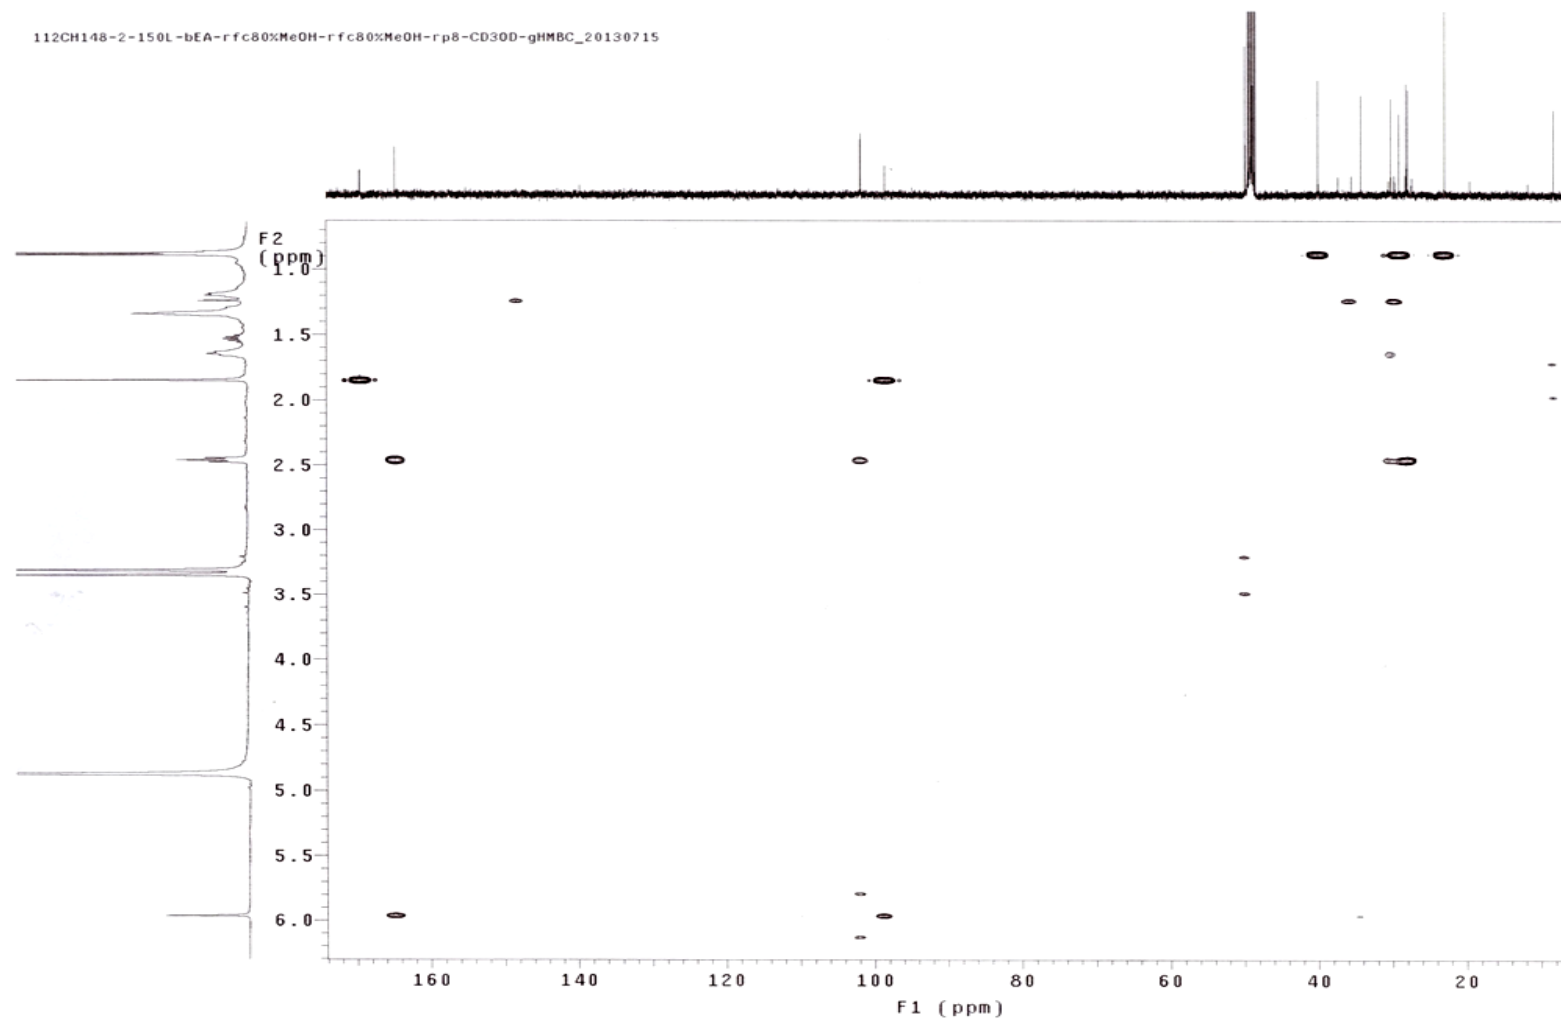

Figure S6. HR-ESIMS data of violapyrone H (1).

## Elemental Composition Report

## Single Mass Analysis

Tolerance = 10.0 PPM / DBE: min = -1.5, max = 50.0

Element prediction: Off

Number of isotope peaks used for i-FIT = 3

## Monoisotopic Mass, Even Electron Ions

31 formula(e) evaluated with 1 results within limits (all results (up to 1000) for each mass)

Elements Used:

C: 1-500 H: 1-1000 O: 1-100 Na: 1-1

Minimum:

Maximum: 5.0 10.0 -1.5

Mass Calc. Mass mDa PPM DBE i-FIT Norm Conf(%) Formula

261.1466 261.1467 -0.1 -0.4 3.5 900.0 n/a n/a C<sub>14</sub>H<sub>22</sub>O<sub>3</sub>Na

131119\_KIOST\_5\_HP

131119\_KIOST\_5\_HP 39 (0.739) AM2 (Ar,30000,0,0,0,0,0); ABS; Cm (2:51)

1: TOF MS ES+  
8.26e+005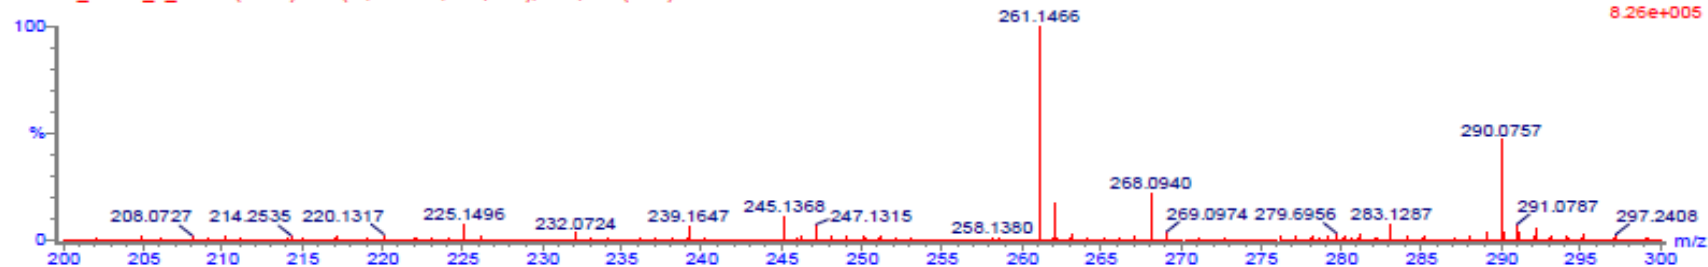

**Figure S7.**  $^1\text{H}$  NMR spectrum of violapyrone I (**2**) in  $\text{CD}_3\text{OD}$  (500 MHz).

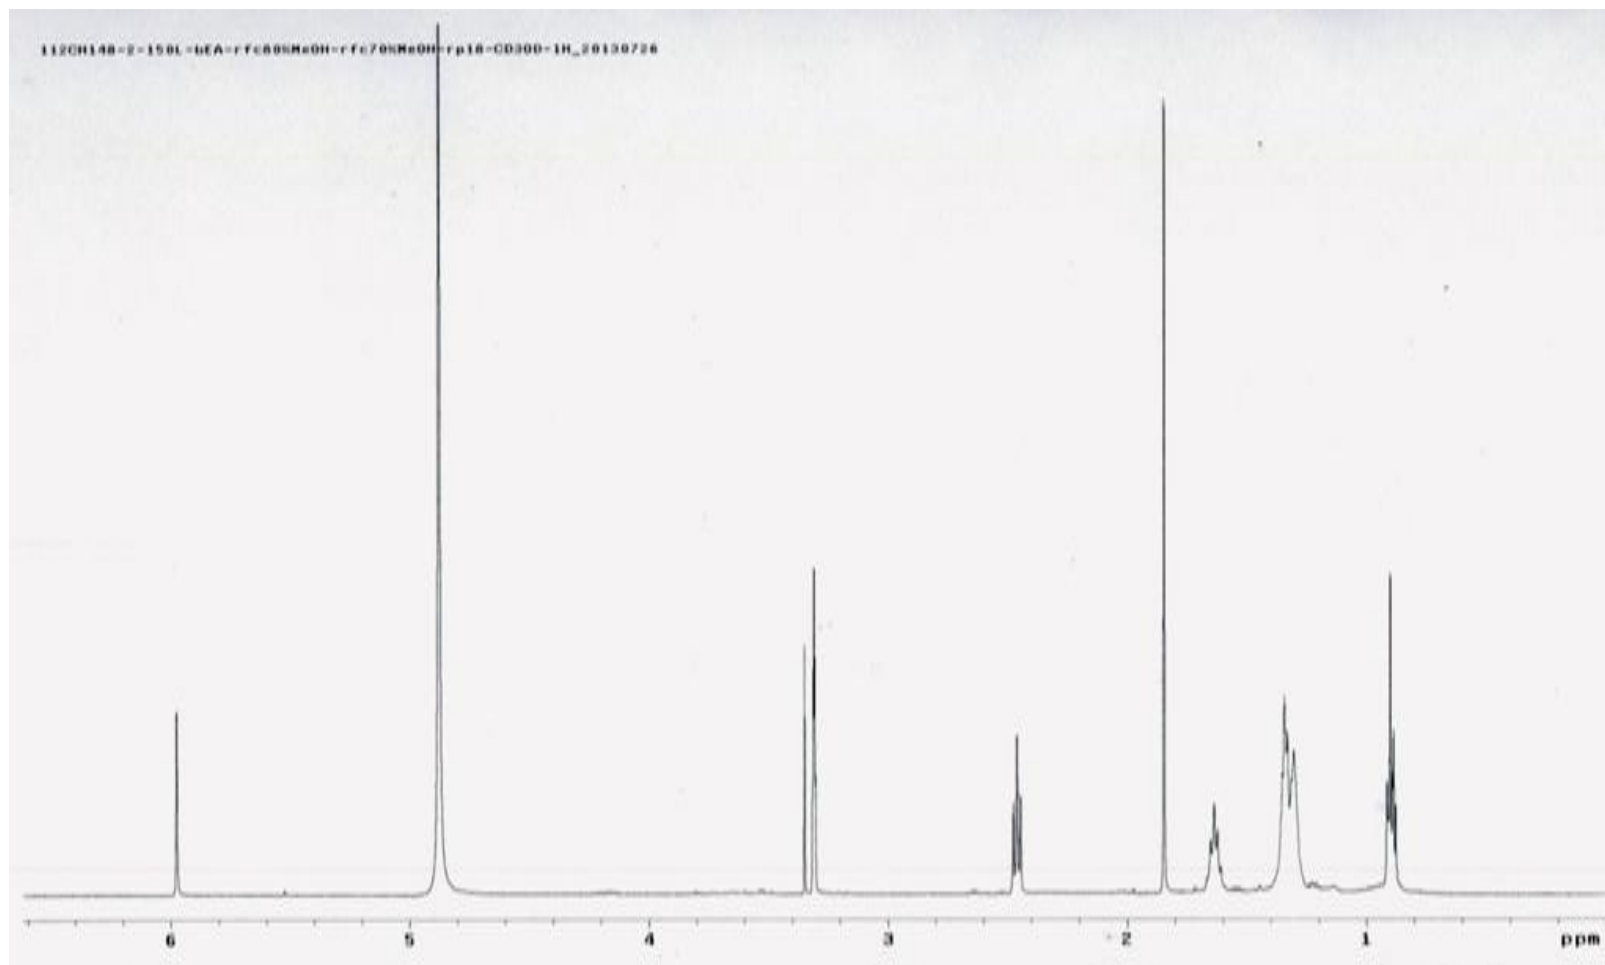



**Figure S8.**  $^{13}\text{C}$  NMR spectrum of violapyrone I (**2**) in  $\text{CD}_3\text{OD}$  (125 MHz).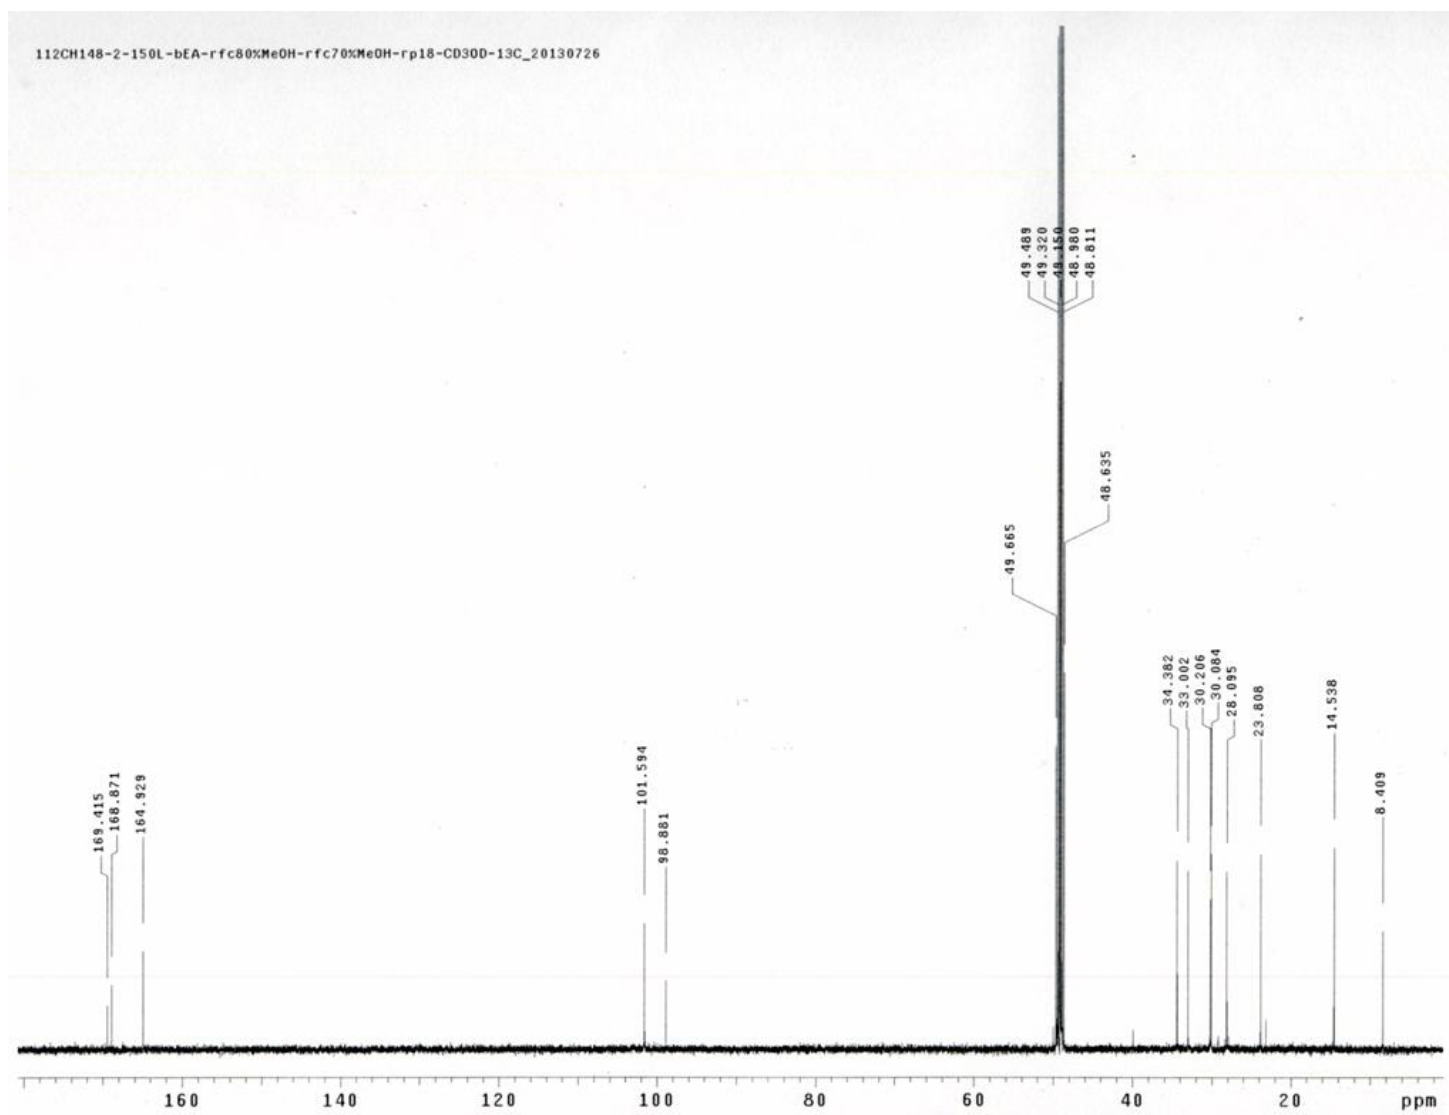

Figure S9. HSQC spectrum of violapyrone I (2) in CD<sub>3</sub>OD.

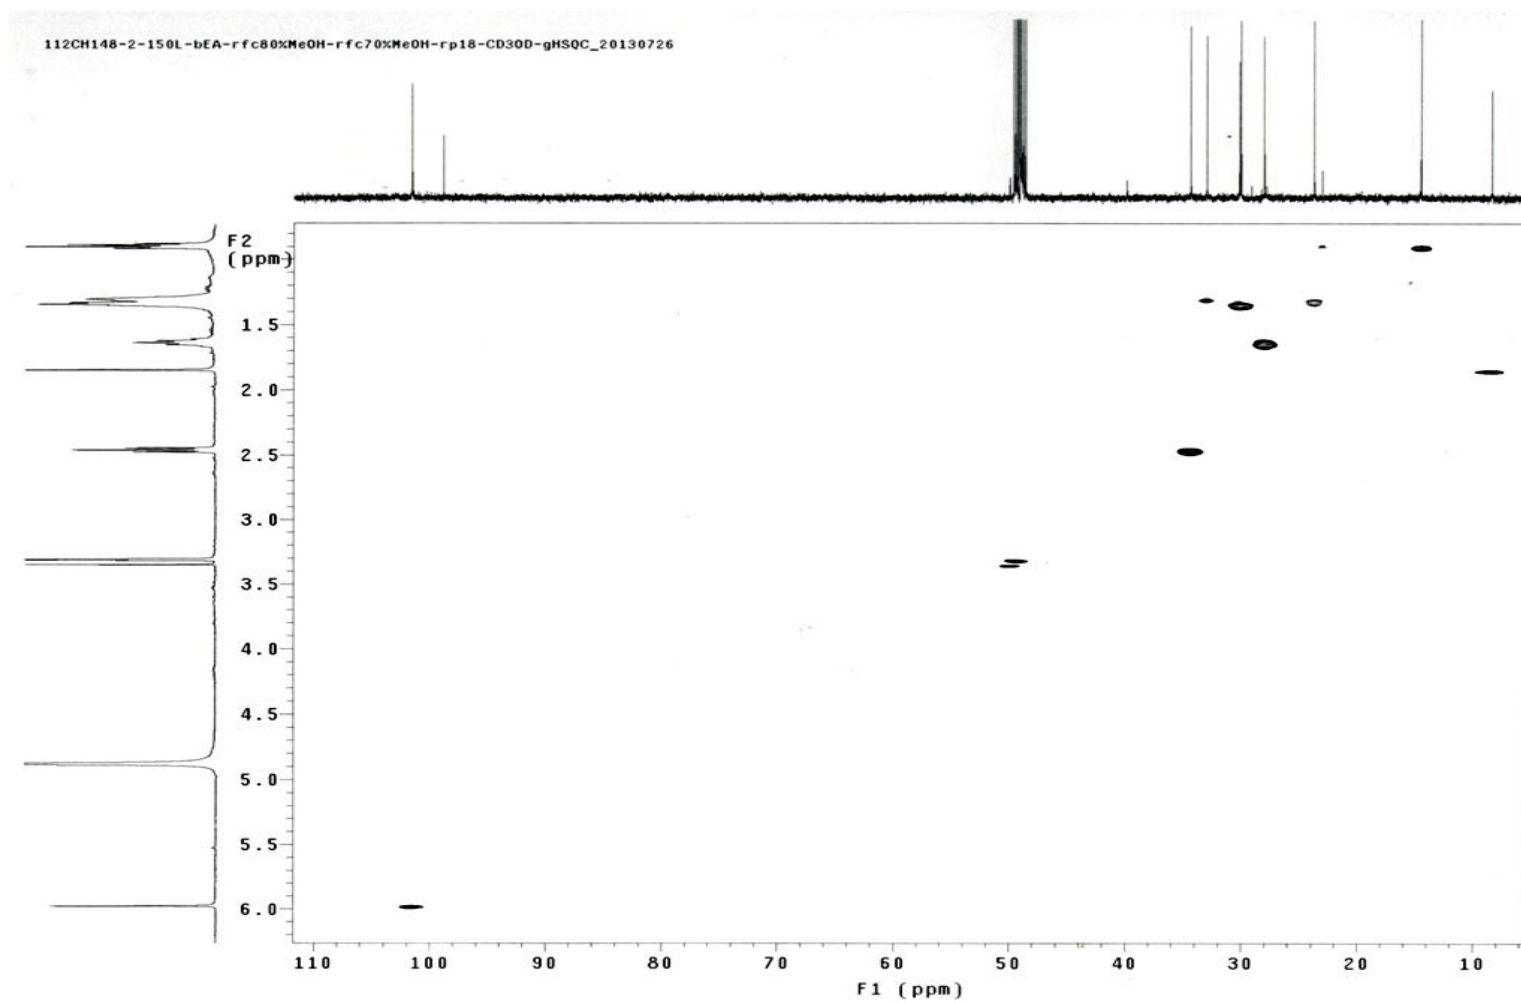

Figure S10. COSY spectrum of violapyrone I (2) in CD<sub>3</sub>OD.

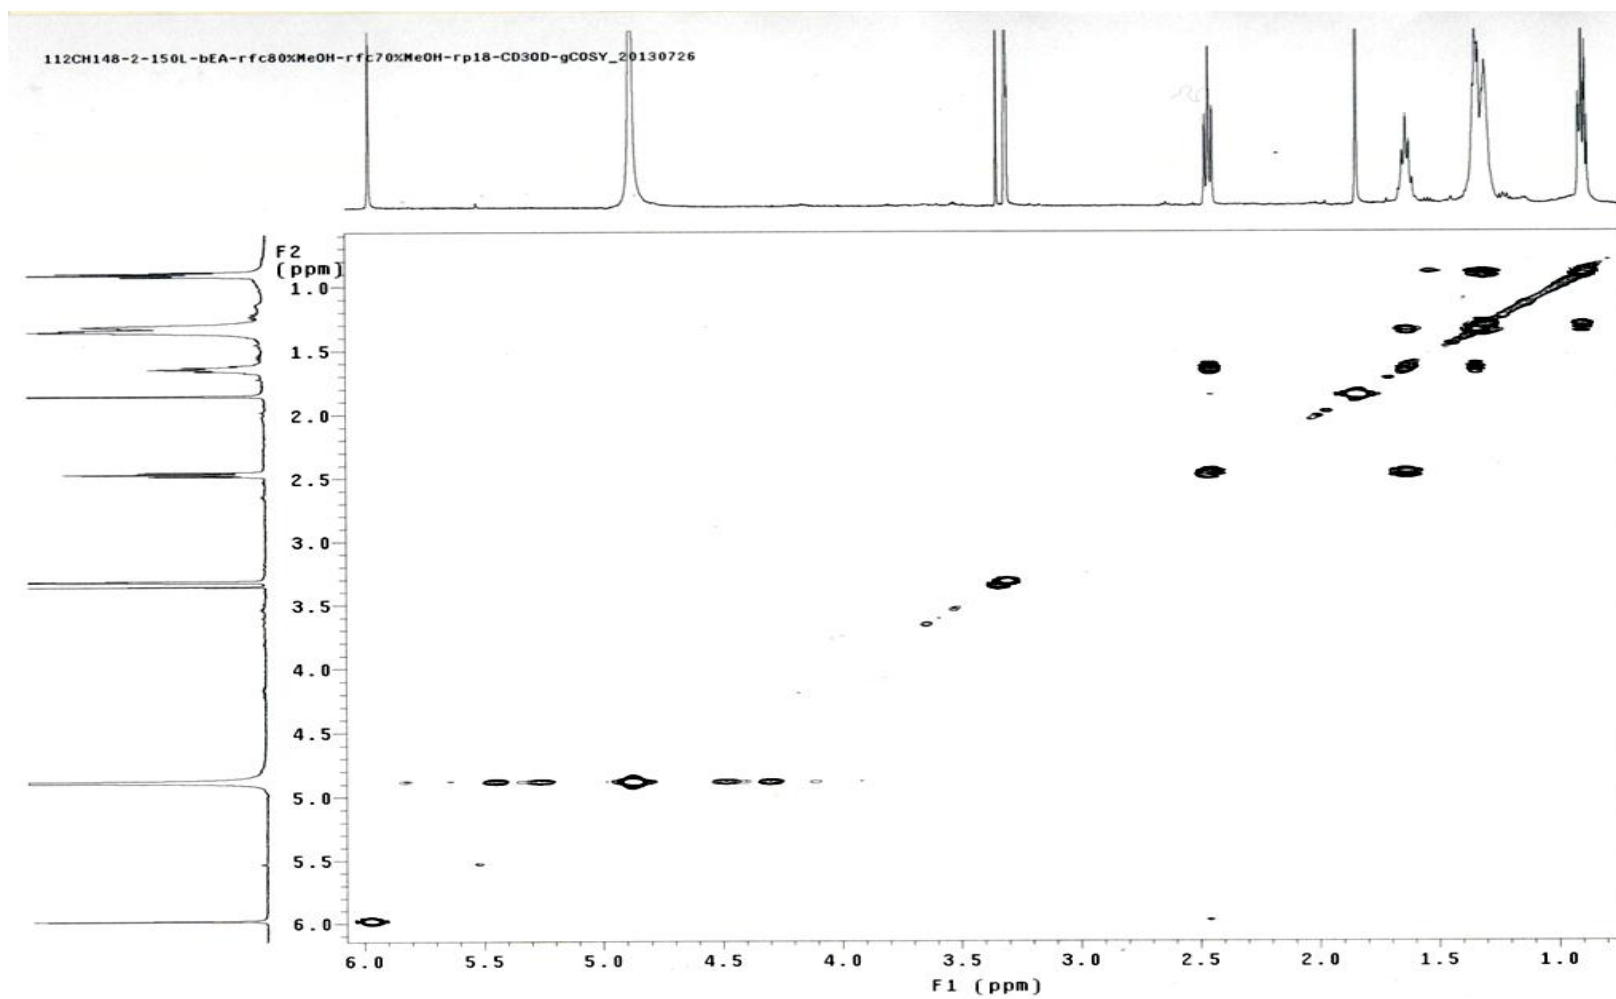

Figure S11. HMBC spectrum of violapyrone I (2) in CD<sub>3</sub>OD.

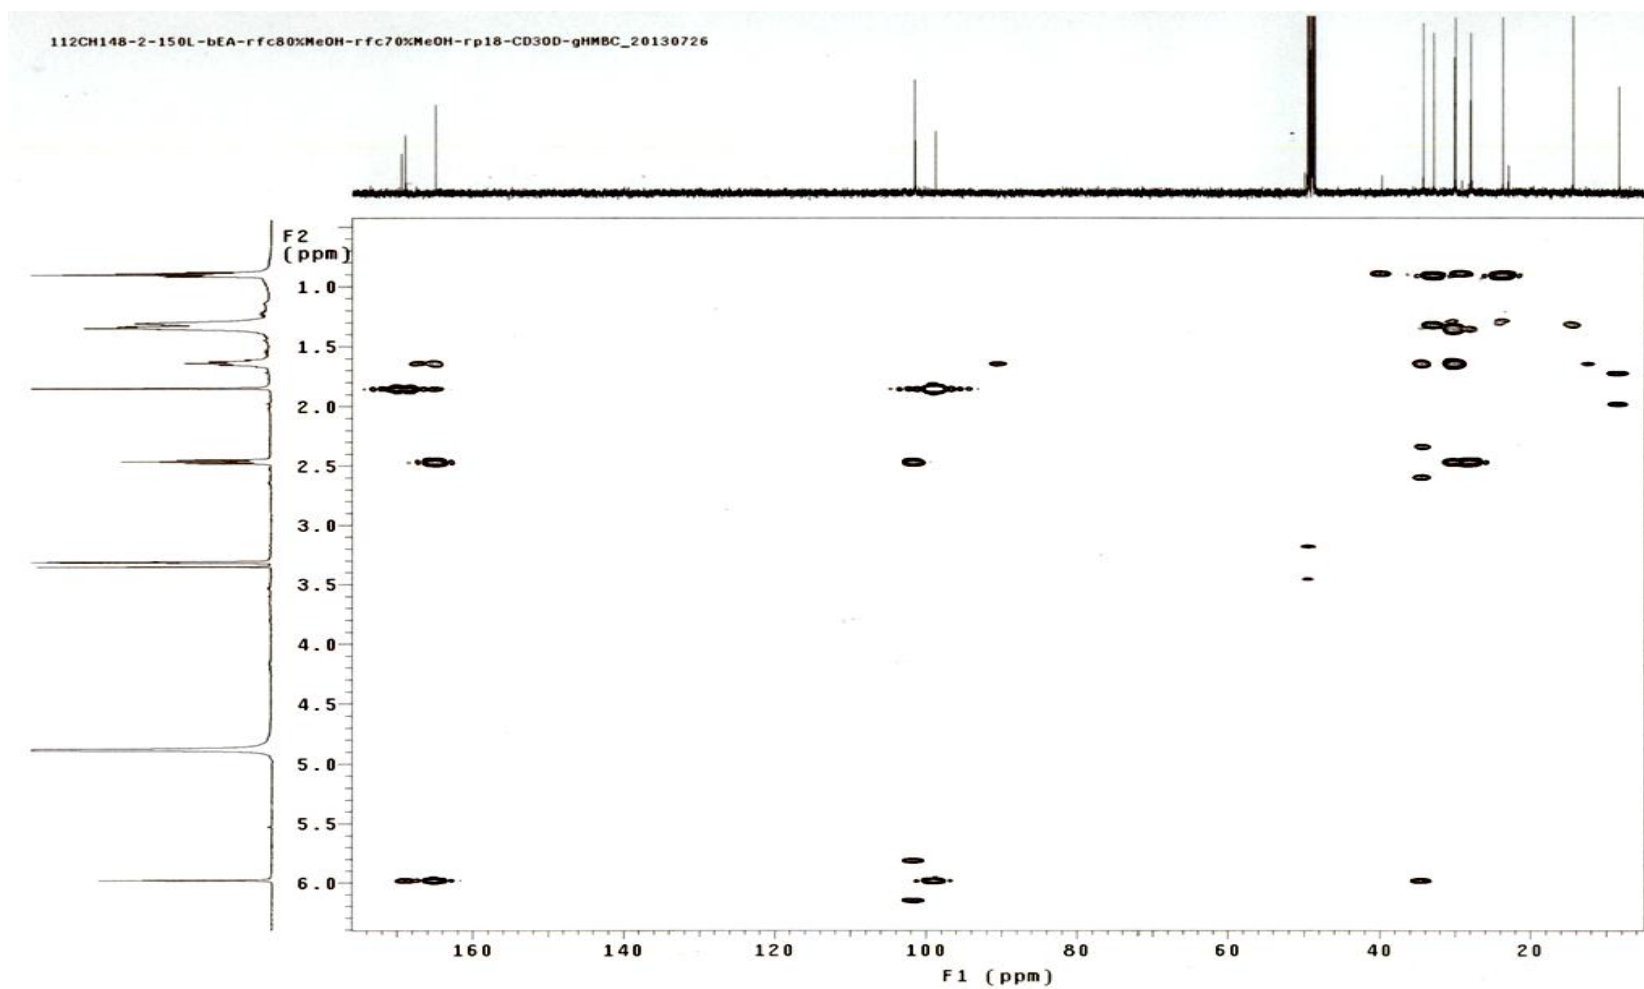

Figure S12. HR-ESIMS data of violapyrone I (2).

## Elemental Composition Report

## Single Mass Analysis

Tolerance = 50.0 PPM / DBE: min = -1.5, max = 50.0

Element prediction: Off

Number of isotope peaks used for i-FIT = 3

| Mass     | Calc. Mass | mDa | PPM | DBE | i-FIT  | Norm | Conf(%) | Formula                                           |
|----------|------------|-----|-----|-----|--------|------|---------|---------------------------------------------------|
| 247.1313 | 247.1310   | 0.3 | 1.2 | 3.5 | 1028.8 | n/a  | n/a     | C <sub>13</sub> H <sub>20</sub> O <sub>3</sub> Na |

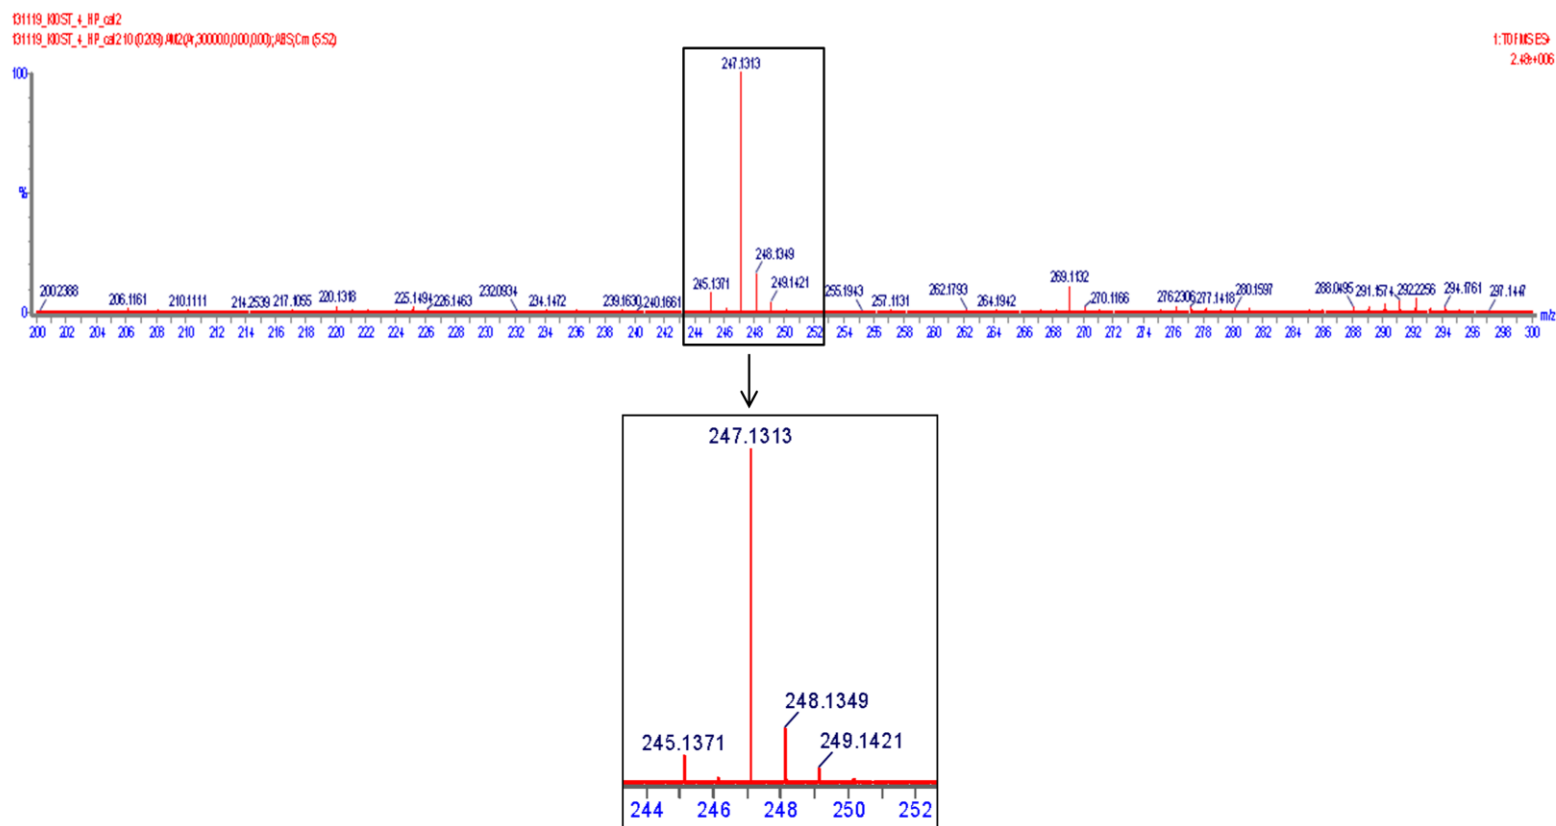

**Figure S13.**  $^1\text{H}$  NMR spectrum of violapyrone B (**3**) in  $\text{CD}_3\text{OD}$  (500 MHz).

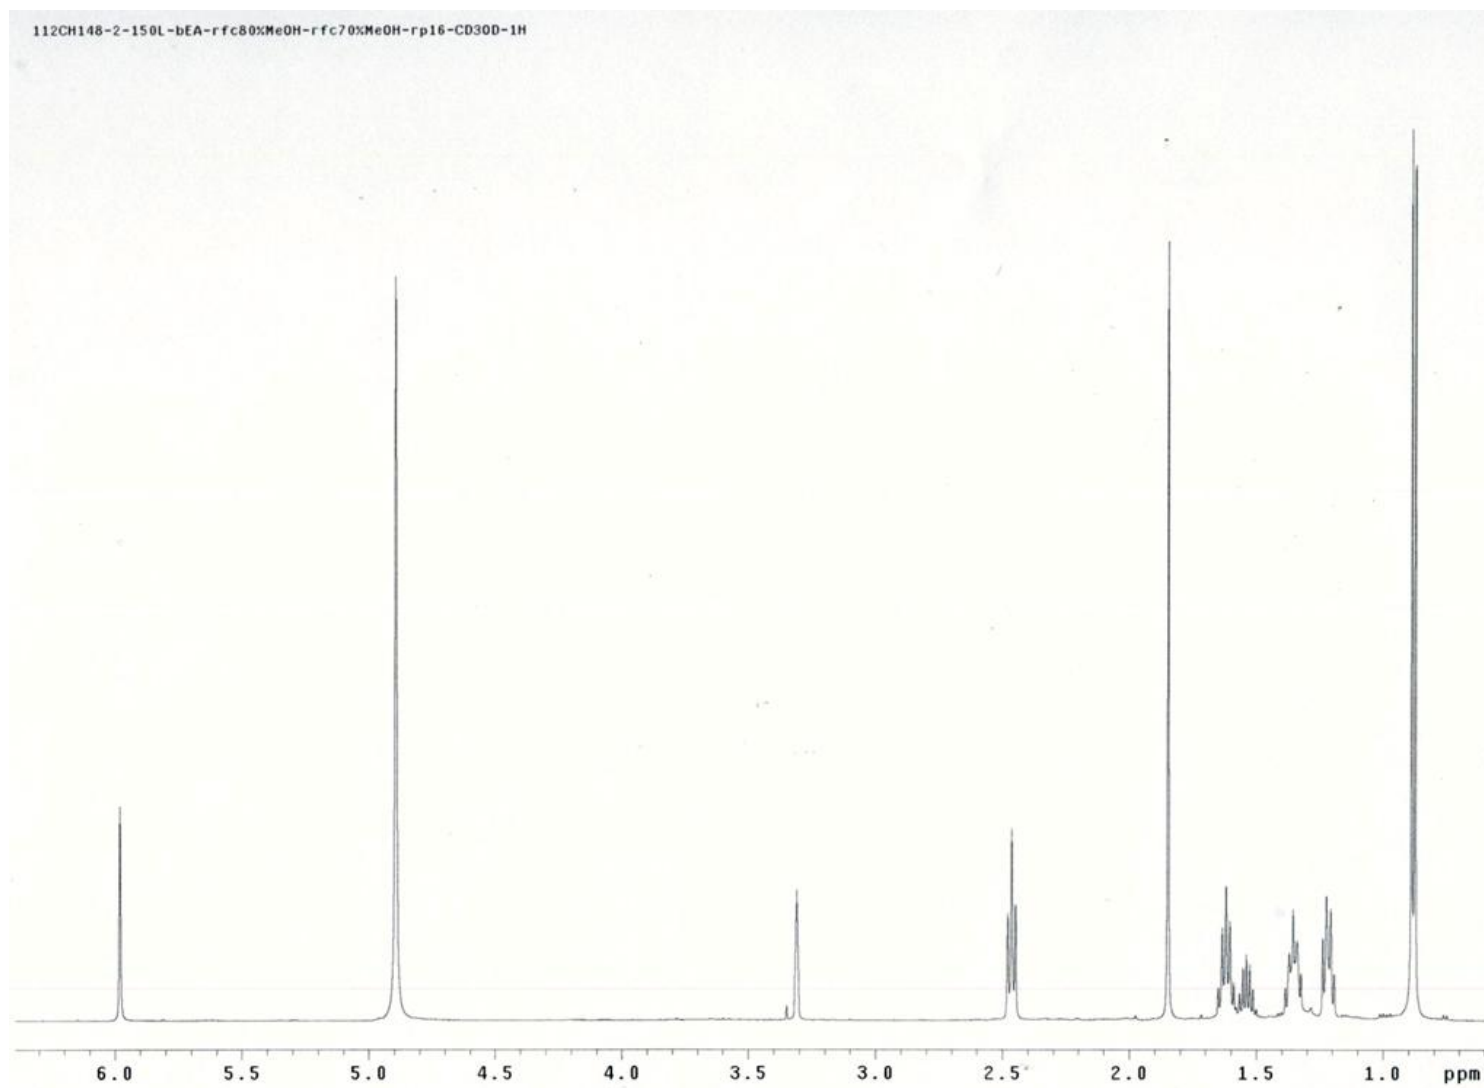

**Figure S14.**  $^{13}\text{C}$  NMR spectrum of violapyrone B (**3**) in  $\text{CD}_3\text{OD}$  (125 MHz).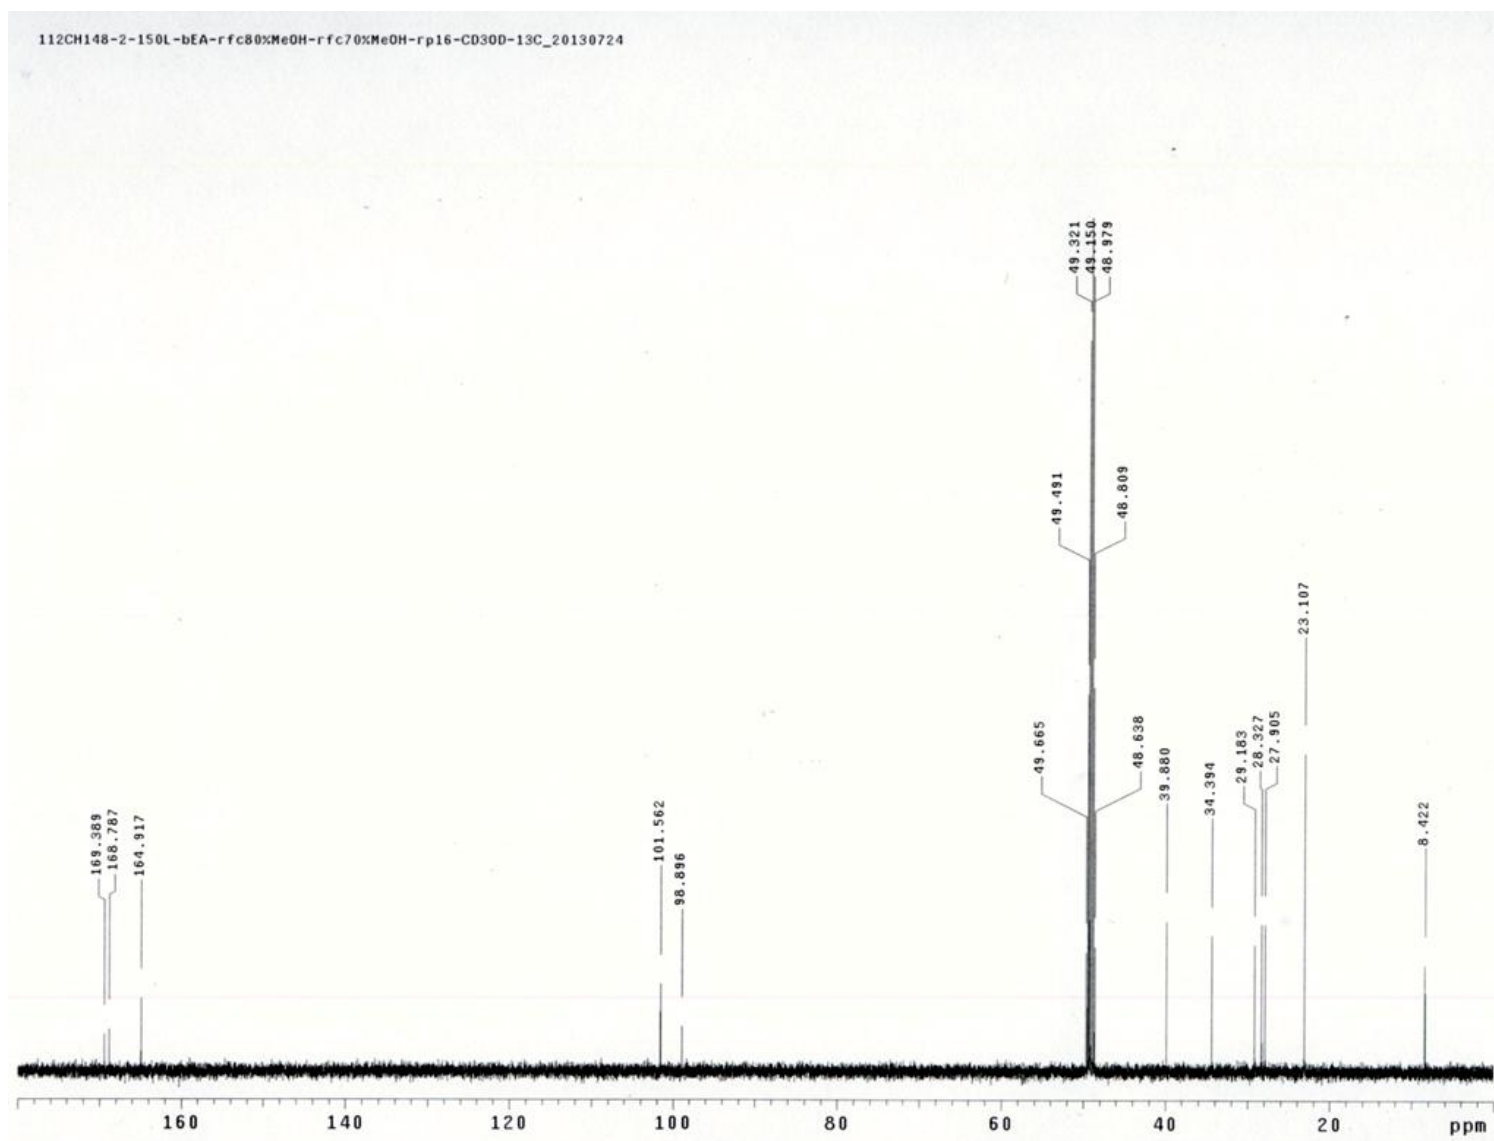

**Figure S15.**  $^1\text{H}$  NMR spectrum of natural (*S*)-violapyrone C (**4**) in  $\text{CD}_3\text{OD}$  (500 MHz).

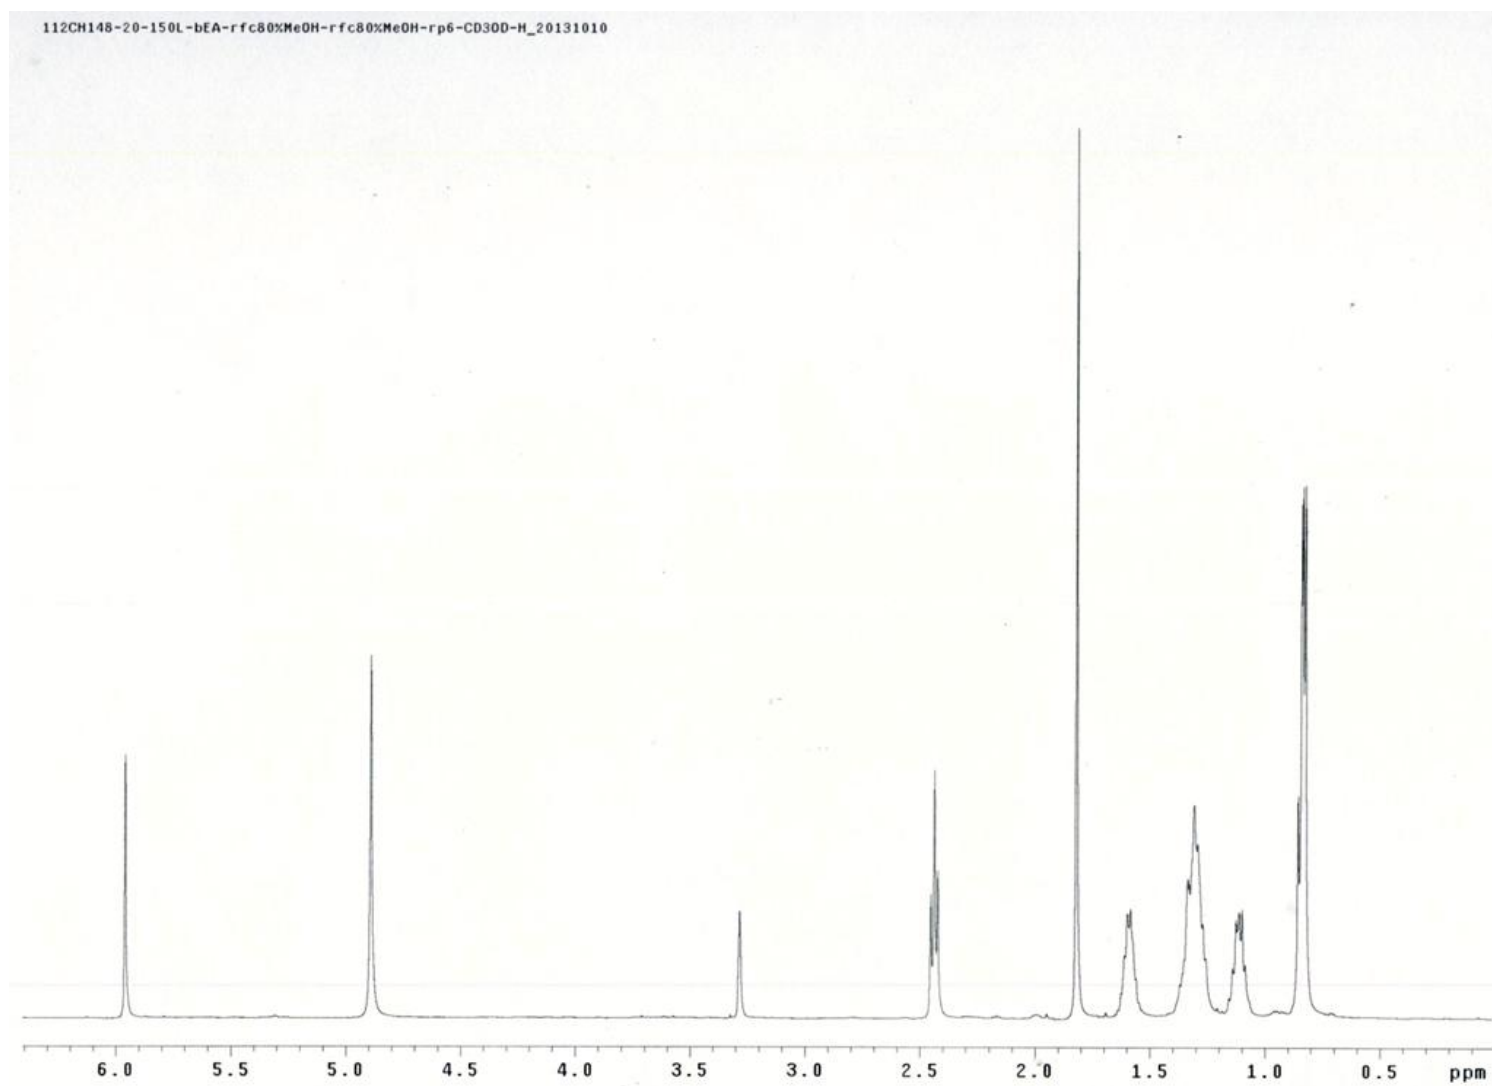



**Figure S16.**  $^1\text{H}$  NMR spectrum of synthetic (*S*)-violapyrone C in  $\text{CD}_3\text{OD}$  (500 MHz).

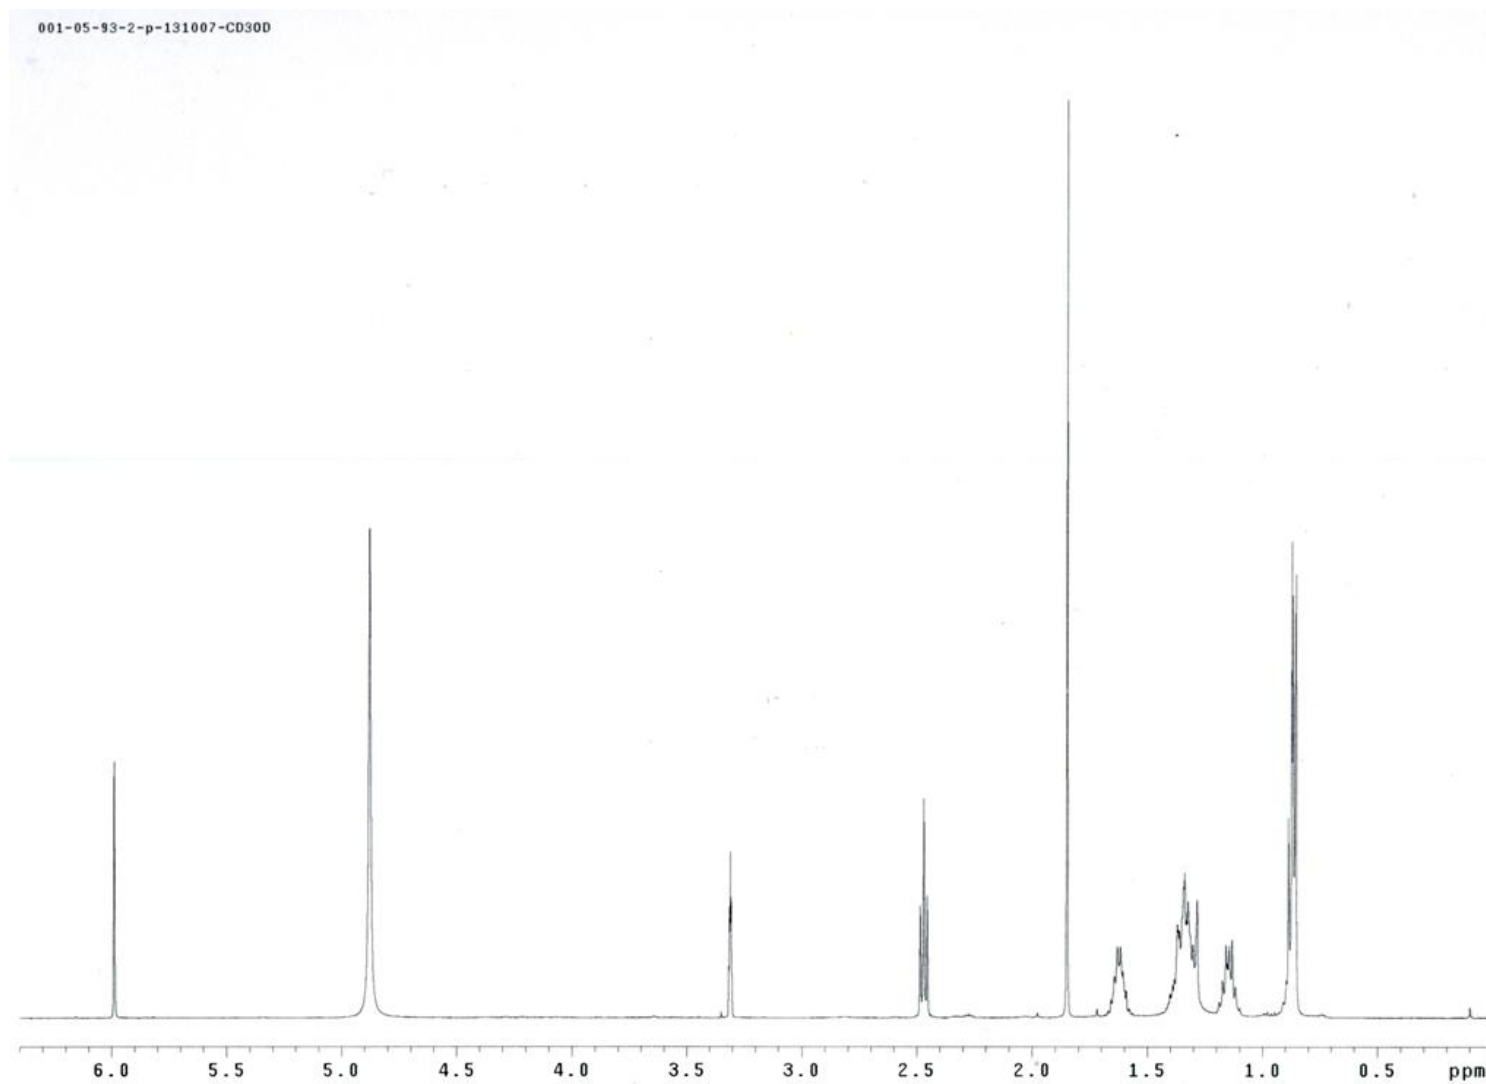

**Figure S17.**  $^{13}\text{C}$  NMR spectrum of natural (*S*)-violapyrone C (**4**) in  $\text{CD}_3\text{OD}$  (125 MHz).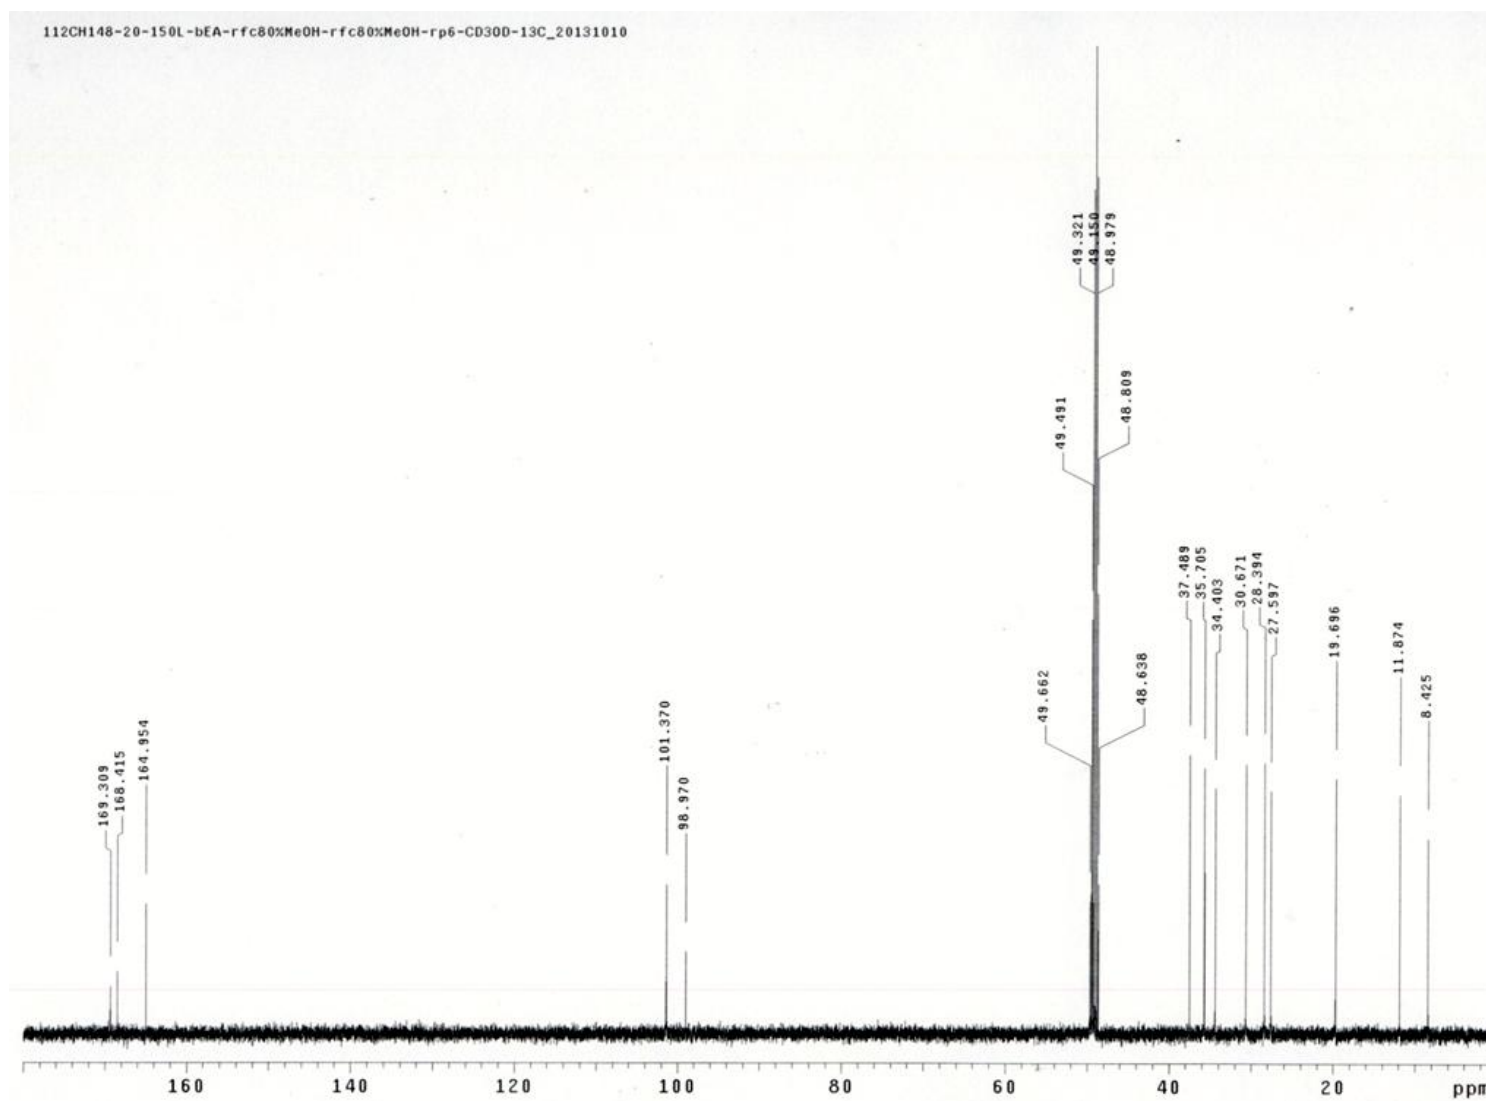

**Figure S18.**  $^{13}\text{C}$  NMR spectrum of synthetic (*S*)-violapyrone C in  $\text{CD}_3\text{OD}$  (125 MHz).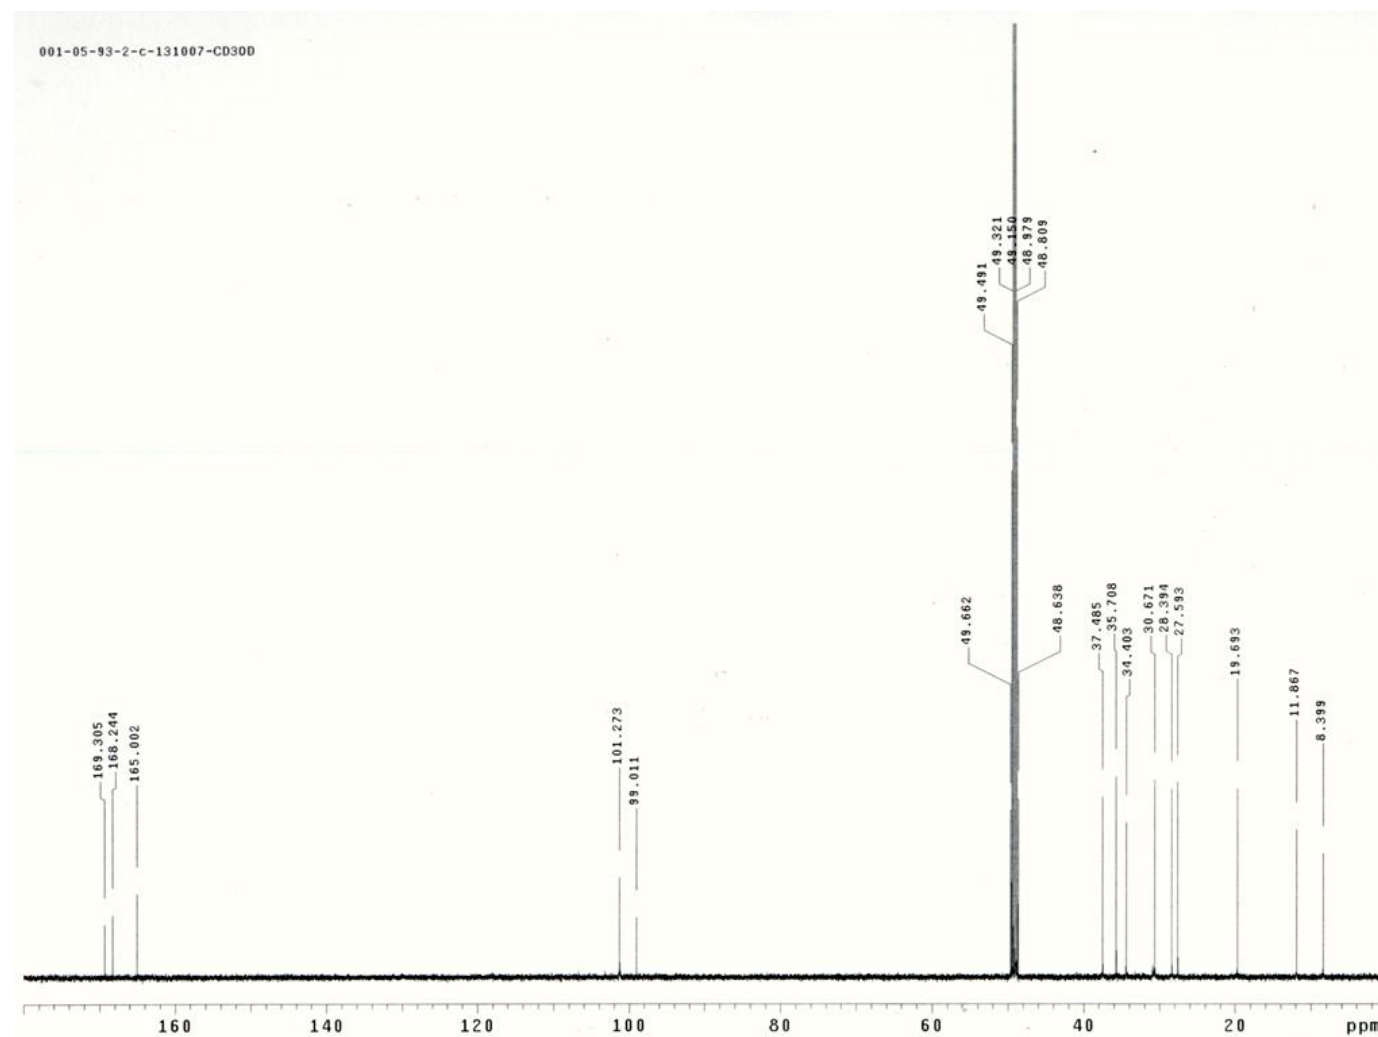

Supplement: s1 [file s1]
